# Supplementary material for: Anodic electrodeposition of a porous nickel oxide–hydroxide film on passivated nickel foam for supercapacitors
Source: Royal Society of Chemistry journal article supplement (doi:10.1039/c4ta00205a), 2014-01-01
Supplement: c4ta00205a1.pdf [file c4ta00205a1.pdf]

## Electronic Supplementary Information

### Anodic Electrodeposition of Porous Nickel Oxide-Hydroxide on Passivated Nickel Foam for Supercapacitors

#### 1. CV curves of the untreated, cleaned and annealed Ni foam

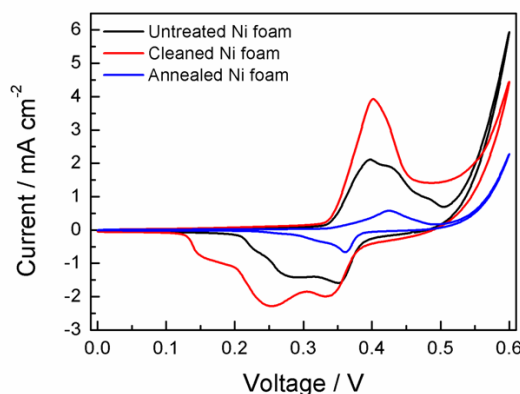

**Fig. S1** CV curves of the untreated, cleaned and annealed Ni foam with the scan rate of 5 mV s<sup>-1</sup>. The calculated areal capacitances of the three samples are 82.7, 145.6 and 18.2 mF cm<sup>-2</sup>. It clearly shows that the current response of the untreated nickel foam, though a little smaller than that of the cleaned foam, is much larger than that of the annealed Ni foam.

#### 2. CV curves of the cleaned and annealed Ni foam with porous NiO(OH) film

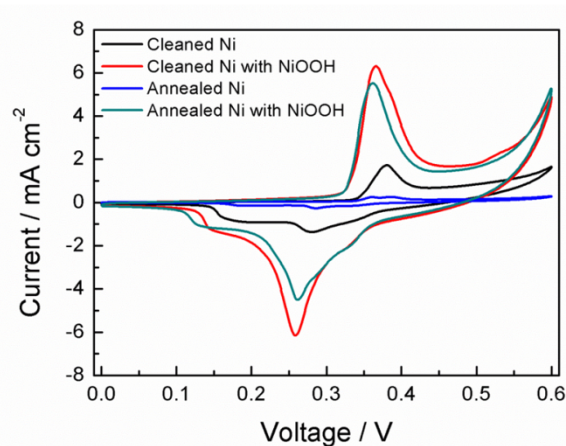

**Fig. S2** CV curves of the cleaned and annealed Ni foam deposited with NiO(OH) at the same scan rate of 3 mV s<sup>-1</sup>. The calculated areal capacitances are 70.9, 228.1, 12.6, 194.9 mF cm<sup>-2</sup> for the cleaned Ni foam, cleaned Ni foam deposited with NiO(OH), the annealed Ni foam and annealed Ni foam deposited with NiO(OH), respectively.

### 3. XPS spectra of the Ni ( $2p_{3/2}$ ) of the cleaned and the annealed Ni foam after immersion in KOH solution

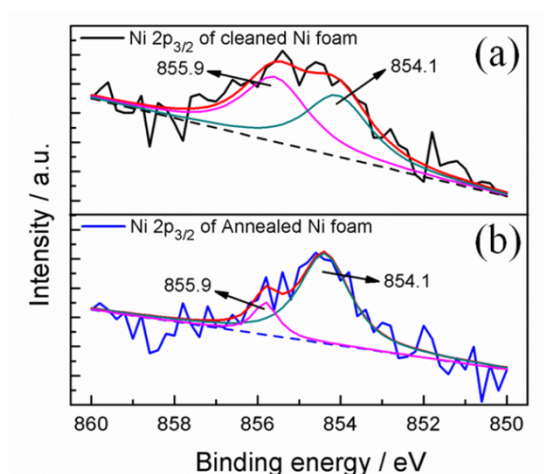

**Fig. S3** (a) and (b) XPS spectra of the Ni ( $2p_{3/2}$ ) of the cleaned and the annealed Ni foam after immersion in 1M KOH solution for 30 minutes. The Ni ( $2p_{3/2}$ ) of the cleaned nickel foam can be deconvolved into two peaks at 854.1 and 855.9 eV, corresponding to nickel  $Ni^{2+}$  in NiO and  $Ni(OH)_2$ . The peak at 855.9 eV of the annealed Ni foam is much weaker than that of the as-cleaned foam, which means that high-temperature annealing passivates the surface and suppresses the reaction of Ni foam surface in KOH solution to form  $Ni(OH)_2$ .

### 4. Uniformity of the NiO(OH) on Ni foam

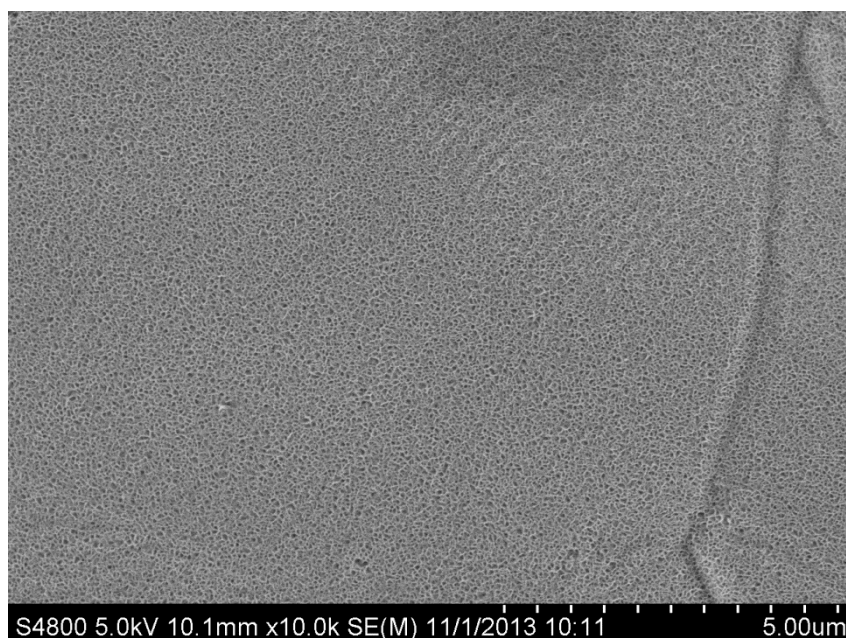

**Fig. S4** Low- magnification SEM image of the NiO(OH) on 3D nickel foam.

## 5. Calculations method:

The areal capacitance ( $\text{mF cm}^{-2}$ ) calculated from CV curves is got by the following equation:

$$C = \frac{1}{S \cdot v \cdot \Delta V} \int I dV$$

Here,  $S$  is the area of the supercapacitor electrode immersed in the electrolyte,  $v$  is the potential scan rate,  $\Delta V$  is the potential window and  $I$  is the current on CV curves.

The specific capacitances ( $\text{F g}^{-1}$ ) calculated from CV and GV curves are got by the following equations:

(1) CV method:

$$C = \frac{1}{m \cdot v \cdot \Delta V} \int I dV$$

Here,  $m$  is the mass of the active material on the electrode,  $v$  is the potential scan rate,  $\Delta V$  is the potential window and  $I$  is the current on CV curves.

(2) GV method:

$$C = \frac{I_{\text{discharge}} \cdot \Delta t}{m \cdot \Delta V}$$

Here,  $m$  is the mass of the active material on the electrode,  $\Delta V$  is the potential window,  $I_{\text{discharge}}$  is the discharge current in GV test and  $\Delta t$  is discharge time at the current of  $I_{\text{discharge}}$ .

Methods to calculate the specific power and specific energy:

$$E = \frac{1}{2} C (\Delta V)^2$$

$$P = \frac{E}{\Delta t}$$

Here,  $E$  is the energy density,  $P$  is the power density,  $\Delta V$  is the potential window,  $C$  and  $\Delta t$  is the specific capacitance and discharge time at the current of  $I_{\text{discharge}}$ .
